# Supplementary material
Source: publisher figshare collection journal article supplement (https://gsajournals.figshare.com/ndownloader/files/18315218)
Supplement: Supplementary file 1 [file 18315218]

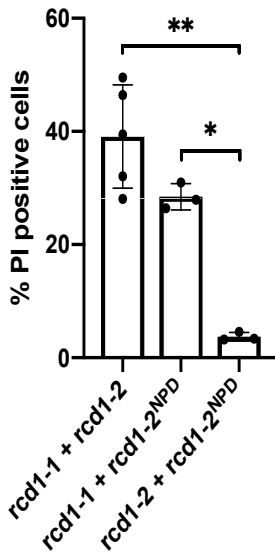

Figure S9. Partial duplication of *rcd1-1* found in strains from the *rcd1-2* genetic background does not impact the GRD phenotype. All *rcd1* alleles are expressed ectopically from the *his-3* locus. Germling death frequencies are measured by the uptake of propidium iodide (PI) using flow cytometry. Experiments were performed at least in triplicate with 20,000 events counted per experiment. \* $P < 0.004$ , \*\* $P < 0.0002$ , one-way ANOVA with Tukey's multiple comparisons test. NPD – no partial duplication.
